1 **Nurtured by nature: Considering the role of environmental and parental legacies in**  
2 **coral ecological performance**

3

4 Hollie M. Putnam<sup>1</sup>, Raphael Ritson-Williams<sup>2</sup>, Jolly Ann Cruz<sup>3</sup>, Jennifer M. Davidson<sup>2</sup>,  
5 Ruth D. Gates<sup>2</sup>

6

7 <sup>1</sup>University of Rhode Island, Department of Biological Sciences, Kingston, RI USA

8 <sup>2</sup>Hawai‘i Institute of Marine Biology, University of Hawai‘i, Mānoa, HI, USA

9 <sup>3</sup>Micronesia Islands Nature Alliance, Garapan, Saipan 96950, CNMI

10 \* Corresponding author: [hputnam@uri.edu](mailto:hputnam@uri.edu), 401-874-9510

11

12 Keywords: trans-generational plasticity, epigenetics, hormesis, *Pocillopora damicornis*,  
13 *Pocillopora acuta*

14

15

16

17

18

19

20

21

22

23

## Positive carryover effects in corals

### 24 **Abstract**

25 The persistence of reef building corals is threatened by human-induced environmental  
26 change. Maintaining coral reefs into the future requires not only the survival of adults,  
27 but also the influx of recruits to promote genetic diversity and retain cover following  
28 adult mortality. Few studies examine the linkages among multiple life stages of corals,  
29 despite a growing knowledge of carryover effects in other systems. We provide a novel  
30 test of coral parental preconditioning to ocean acidification (OA) to better understand  
31 impacts on the processes of offspring recruitment and growth. Coral planulation was  
32 tracked for three months following adult exposure to high pCO<sub>2</sub> and offspring from the  
33 second month were reciprocally exposed to ambient and high pCO<sub>2</sub>. Offspring of parents  
34 exposed to high pCO<sub>2</sub> had greater settlement and survivorship immediately following  
35 release, retained survivorship benefits during one and six months of continued exposure,  
36 and further displayed growth benefits to at least one month post release. Enhanced  
37 performance of offspring from parents exposed to high conditions was maintained despite  
38 the survivorship in both treatments declining in continued exposure to OA.  
39 Preconditioning of the adults while they brood their larvae may provide a form of  
40 hormetic conditioning, or environmental priming that elicits stimulatory effects. Defining  
41 mechanisms of positive carryover effects, or positive trans-generational plasticity, is  
42 critical to better understanding ecological and evolutionary dynamics of corals under  
43 regimes of increasing environmental disturbance. Considering parental and  
44 environmental legacies in ecological and evolutionary projections may better account for  
45 coral reef response to the chronic stress regimes characteristic of climate change.

46

47 **Introduction**

48 Reef-building corals are the foundation for one of the most diverse and economically  
49 important ecosystems (Bishop et al., 2011; Costanza et al., 2014). Corals are sensitive to  
50 changes in their environment that destabilize the coral-algal symbiosis and disrupt reef  
51 primary production and net ecosystem accretion. Even slight perturbations in temperature  
52 nutrients, light, salinity, and pollution, can negatively affect coral symbiosis and  
53 performance (Lesser, 2011) The steady increase in CO<sub>2</sub> emissions (Pachauri et al., 2014)  
54 is heightening the magnitude and frequency of global scale environmental perturbations,  
55 exacerbating reef decline already occurring due to local pressures.

56 The emission of CO<sub>2</sub> is driving elevated atmospheric levels, which is in turn  
57 changing the chemistry of the oceans. Ocean acidification (OA) is occurring due to the  
58 absorption of atmospheric CO<sub>2</sub> by the ocean and the resulting increase and decrease in  
59 the concentrations of H<sup>+</sup> and CO<sub>3</sub><sup>-2</sup> ion concentrations, respectively (Doney, Fabry, Feely,  
60 & Kleypas, 2009). OA energetically challenges calcifying marine organisms because they  
61 expend more energy for acid-base regulation to both maintain cellular homeostasis  
62 (Kaniewska et al., 2012; Stumpp et al., 2012) and calcify in a medium with lower CO<sub>3</sub><sup>-2</sup>  
63 ion concentrations. The physiological and ecological consequences of OA range from  
64 changes in intracellular pH (Gibbin, Putnam, Davy, & Gates, 2014; Gibbin, Putnam,  
65 Gates, Nitschke, & Davy, 2015), to direct reduction of calcification of coral skeletons  
66 (Erez, Reynaud, Silverman, Schneider, & Allemand, 2011), to shifts in community  
67 composition in low pH areas (Fabricius et al., 2011). Further, the interaction of multiple  
68 stressors such as temperature and OA is likely to result in synergistic and antagonistic

## Positive carryover effects in corals

69 responses in comparison to the responses driven by individual stressors (Harvey, Gwynn-  
70 Jones, & Moore, 2013; Pandolfi, Connolly, Marshall, & Cohen, 2011).

71         Given that local coral reef decline is now exacerbated by global issues, a greater  
72 effort is being made to better understand the sub-lethal physiological effects of stressors  
73 on critical coral reef processes such as coral reproduction and early life stages (Albright,  
74 2011; Byrne & Przeslawski, 2013). Corals are long-lived organisms with complex  
75 reproductive life history characteristics (Baird, Guest, & Willis, 2009). Early life history  
76 research has focused heavily on the effects of anthropogenic factors (e.g., increased  
77 temperature and ocean acidification) on fertilization and development, metamorphosis,  
78 settlement, and survivorship in spawning corals (Albright, 2011; Chua, Leggat, Moya, &  
79 Baird, 2013; Chua, Leggat, Moya, & Baird, 2013; Foster, Gilmour, Chua, Falter, &  
80 McCulloch, 2015; Negri, Marshall, & Heyward, 2007; Randall & Szmant, 2009), and a  
81 variety of physiological metrics in brooding corals (Cumbo, Edmunds, Wall, & Fan,  
82 2013; Dufault, Cumbo, Fan, & Edmunds, 2012; Putnam, Edmunds, & Fan, 2010; Rivest  
83 & Hofmann, 2014, 2015). Few studies have, however, tracked corals through multiple  
84 life history stages including larval supply, settlement and post-settlement survival and  
85 growth (Albright, 2011; Ritson-Williams, Arnold, & Paul, 2016; Ross, Ritson-Williams,  
86 Olsen, & Paul, 2013), fewer still at the cross-generational scale (Putnam & Gates, 2015),  
87 and none at the multigenerational scale. Thus the forecasts for population persistence and  
88 replenishment have largely ignored the potentially substantial plasticity driven by  
89 environmental and parental legacies (Donelson, Salinas, Munday, & Shama, 2017; Torda  
90 et al., 2017).

## Positive carryover effects in corals

91           Phenotypic plasticity, or the generation of multiple performance outcomes within  
92 an individual as a function of environment, has the potential to act as a buffer to rapid  
93 environmental change and modulate evolutionary response (Chevin, Collins, & Lefèvre,  
94 2013; Gibbin et al., 2017; Putnam & Gates, 2015). Multiple avenues can generate this  
95 plasticity. While intra-generational studies of phenotypic plasticity are more common, the  
96 study of trans-generational plasticity (TGP) is still in its relative infancy for marine  
97 invertebrates (Donelson et al., 2017; Foo & Byrne, 2016; Ross, Parker, & Byrne, 2016;  
98 Torda et al., 2017). TGP occurs when environmental legacies manifest through linked life  
99 stages (i.e., the norms of reaction are shaped by the environmental conditions of prior  
100 generations). Due to the difficulty of disentangling TGP *sensu stricto* (Donelson et al.,  
101 2017; Torda et al., 2017), the plasticity exhibited between life stages can also be more  
102 generically discussed as carryover effects, which encompass the potential for TGP and  
103 developmental acclimation. The lack of data on these life stage linkages in corals is now  
104 particularly critical in light of severe ecosystem declines and the growing  
105 acknowledgement that adaptive responses are necessary for persistence under rapid  
106 climate change (Gaylord et al., 2015; Munday, Warner, Monro, Pandolfi, & Marshall,  
107 2013; Sunday et al., 2014; Sunday, Crim, Harley, & Hart, 2011).

108

109           The ecological and evolutionary ramifications of carryover effects from parental  
110 or early life stage exposure in longer-lived, ecosystem engineering, calcifying marine  
111 invertebrates in response to OA remain to be determined. To date, early life stage  
112 exposure often appears to have negative carryover effects. Assessment of Olympia oyster  
113 performance following exposure to high pCO<sub>2</sub> at the larval stage by Hettinger and

## Positive carryover effects in corals

114 coauthors revealed slower growth under high conditions. Even after the juveniles were  
115 placed in ambient grow out conditions, negative carryover effects remained at 45 days  
116 post exposure (Hettinger et al., 2012). Further assessment of the ecological performance  
117 of *Olympia* oyster growth in ambient field conditions four months post exposure to high  
118 pCO<sub>2</sub>, revealed negative carryover effects on growth rate (Hettinger et al., 2013). Some  
119 corals also appear to display negative carryover effects from stressors at the larval stage.  
120 In larvae of *Orbicella faveolata*, low salinity treatments caused decreased survival and  
121 growth after settlement (Vermeji et al., 2006). Similarly, in larvae of *Porites astreoides*  
122 early life exposure to elevated seawater temperatures caused significantly higher  
123 mortality in settled coral spat ~3 weeks post exposure in comparison to larvae raised in  
124 ambient temperatures (Ross et al., 2013). While studies in both oysters and corals identify  
125 carryover effects of early life stage exposure to stressors, this does not account for  
126 plasticity that may be induced by parental environment (i.e., TGP).

127        Depending on the timing of exposure, environmental conditioning can set  
128 organisms on different physiological and ecological trajectories (Foo & Byrne, 2016;  
129 Ross et al., 2016; Torda et al., 2017). Studies considering the ontogenetic connections in  
130 organisms with shorter life spans such as plankton, worms, oysters, clams, and fishes,  
131 have documented substantial, and often positive TGP (Chakravarti et al., 2016; Foo &  
132 Byrne, 2016; Gibbin et al., 2017; Lane, Campanati, Dupont, & Thiyagarajan, 2015;  
133 Miller, Watson, Donelson, McCormick, & Munday, 2012; Parker et al., 2012, 2017;  
134 Ross et al., 2016; Thor & Dupont, 2015; Zhao et al., 2018). For example, in the Sydney  
135 rock oyster, parental exposure to high pCO<sub>2</sub> enhanced growth, development, and  
136 metabolism in F1 offspring exposed to the same high pCO<sub>2</sub> conditions (Parker et al.,

## Positive carryover effects in corals

137 2012). Further, positive TGP was again observed in the F2 generation, in terms of  
138 development, growth, and juvenile heart rate in the trans-generational exposure line,  
139 relative to the control line (Parker, O'Connor, Raftos, Pörtner, & Ross, 2015). To date,  
140 only one study of reef building corals has demonstrated cross-generational  
141 acclimatization at the swimming planulae stage (Putnam & Gates, 2015), but the longer-  
142 term implications of this plasticity across subsequent life stages are not yet known. These  
143 responses demonstrate that understanding the potential carryover effects from parents  
144 through ontogeny (i.e., ecological ramifications of TGP) is critical to our view of  
145 organism performance on annual to decadal time scales.

146

147 The ecological implications of carryover effects have not been considered in  
148 projections of coral performance in a future of climate change, yet acclimatization is  
149 known to play a key role in intra-generational stress response (Brown & Cossins, 2011;  
150 Brown, Dunne, Goodson, & Douglas, 2000; Coles & Brown, 2003), and our initial work  
151 in corals suggests positive TGP is possible in corals (Putnam & Gates, 2015). Our  
152 current study investigates the effects of adult preconditioning on offspring ecological  
153 performance in response to OA conditions. Here, we tested the hypothesis that parental  
154 exposure of corals to high pCO<sub>2</sub> during gametogenesis and/or brooding results in  
155 beneficial acclimation of the offspring. Further, we tested the hypothesis that these  
156 carryover effects are maintained beyond the larval stage, through settlement into the  
157 juvenile stage, by assessing settlement and survivorship post release and tracking  
158 survivorship and growth for six months in ambient and elevated pCO<sub>2</sub> treatments.

159

160 **Materials and Methods**

161 *Experimental Overview*

162 The experiment consisted of four phases (Fig. 1). First, adult coral colonies were  
163 acclimated to ambient conditions in common garden tanks for 34d (Fig. 1a). Second,  
164 adults were exposed to two different pCO<sub>2</sub> treatments that fluctuated with a diurnal  
165 frequency for the period that contained gametogenesis and brooding, over 3 cycles of  
166 planulation (~3 months, Fig 1b.). Third, larvae were collected from the pre-conditioned  
167 adults and exposed to the two different pCO<sub>2</sub> conditions in a reciprocal fashion (Fig. 1c-  
168 e) in acrylic and mesh chambers containing a settlement tile: Survivorship and settlement  
169 of offspring during this phase were assessed after 96h. Fourth, the settled spat were  
170 tracked for survivorship and growth (Fig. 1f) in continued reciprocal exposure after one  
171 and six months post release.



## Positive carryover effects in corals

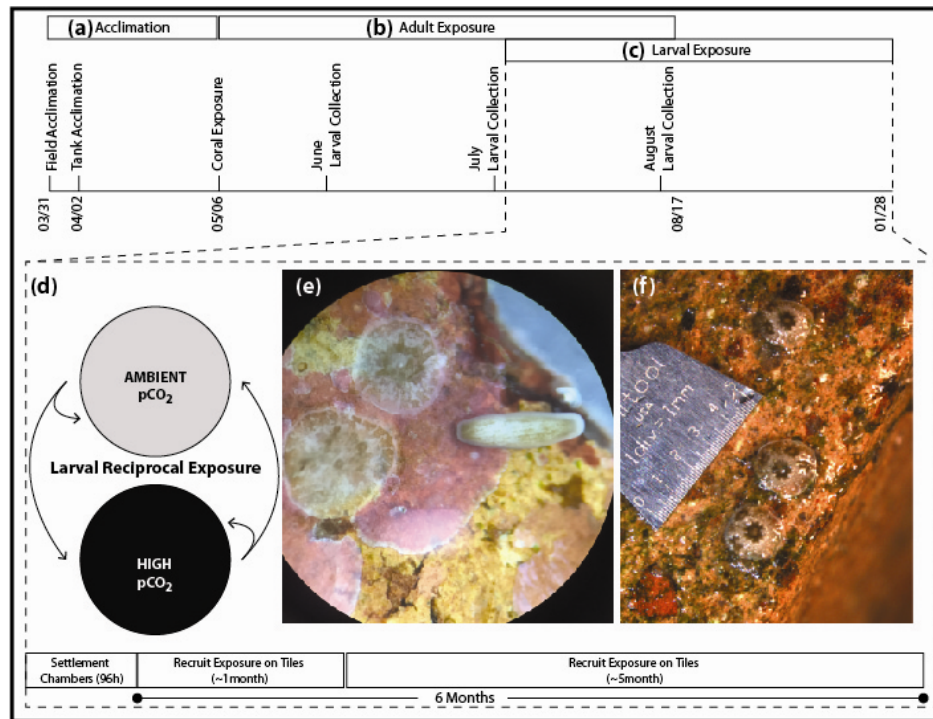

**Figure 1. Experimental Design** (a) Coral acclimation and (b) experimental timeline to test the effects of adult preconditioning on larval release larval performance at (c, d) ambient and high pCO<sub>2</sub> conditions in terms of (e) settlement, survivorship and (f) growth and survivorship were examined.

172

173 *Coral Collection and Acclimation*

174 Adult *Pocillopora damicornis* colonies (now considered *P. acuta* based on mitochondrial  
175 open reading frame, mtORF, sequencing (Johnston, Forsman, & Toonen, 2018) were  
176 collected from the fringing reefs of southern Kāneohe Bay, O’ahu, Hawai’i  
177 (21.429845, -157.793604) under Special Activities Permit SAP2014 from Hawaii’s  
178 Division of Aquatic Resources (DAR). Corals were removed from the reef at the dead  
179 skeleton base to minimize direct tissue damage and were placed immediately adjacent to  
180 each other in a common garden in the field for a 3-day acclimation period (e.g., Putnam,  
181 Davidson, & Gates, 2016). Subsequently, corals (n=16) were moved to large, outdoor,

## Positive carryover effects in corals

182 sand-filtered, flow-through seawater, mesocosm tanks (~1,300L) at the Hawai'i Institute  
183 of Marine Biology, HIMB (described in Putnam et al., 2016). Irradiance in the  
184 mesocosm tanks was reduced to ~60% full irradiance using shade cloth to more closely  
185 mimic collection site *in situ* light conditions, and light readings were taken every 15 min  
186 with underwater loggers (Odyssey PAR loggers standardized to Li-Cor 192SA cosine  
187 sensor; Long et al. 2012; Fig. S1). Seawater temperature was also recorded every 15 min  
188 (Hobo Water Temp Pro v2, accuracy = 0.21°C, resolution = 0.02°C, Onset Computer  
189 Corporation, Fig. S1). Light, temperature and pH fluctuated within the tanks on natural  
190 cycles (Fig. S1). Corals acclimated to these tank conditions for 34d prior to initiation of  
191 treatments.

192

### 193 *Experimental Exposure*

194 The treatment (high pCO<sub>2</sub>) and control conditions (ambient seawater) were maintained  
195 using a pH-stat CO<sub>2</sub> injection system (Putnam et al., 2016). Ambient pH and pCO<sub>2</sub>  
196 fluctuated daily (e.g., (Drupp, De Carlo, Mackenzie, Bienfang, & Sabine, 2011), driven  
197 by ambient conditions and feedbacks from photosynthesis, calcification, and respiration  
198 of the organisms on the fringing reef directly off shore of HIMB, where the seawater was  
199 obtained. The high CO<sub>2</sub> treatment conditions retained natural diel variability while  
200 decreasing the pH (Fig. S1). pH probes from the pH-stat CO<sub>2</sub> injection system were  
201 calibrated weekly on the NBS scale and pH and temperature were logged every 15 min in  
202 each tank throughout the duration of the experiment. The carbonate chemistry of the  
203 seawater was assessed with discrete measurements of pH (total scale), total alkalinity,  
204 temperature and salinity according to the Guide to Best Practices (Riebesell, Fabry,

## Positive carryover effects in corals

205 Hansson, Gattuso, & others, 2010). Discrete measurements were made ~daily and water  
206 samples were collected ~2x per week for each adult treatment. Given the stability of the  
207 total alkalinity and low biomass in the 1,300L tanks, sampling frequency was reduced in  
208 the 6 months of offspring exposure to ~ every 1-2 weeks, while pH, temperature, and  
209 light were tracked continuously (Fig S1). Total alkalinity samples were analyzed using  
210 open cell potentiometric titrations (Dickson, Sabine, & Christian, 2007) and assessed  
211 against certified reference materials (CRMs; A. Dickson Laboratory, UCSD; values on  
212 average <1% different from TA CRMs); all samples were corrected for any offset from  
213 the CRMs. From these measurements, the full suite of carbonate parameters was  
214 calculated with the seacarb package (v3.0.11, Gattuso et al., 2016), using the average  
215 corrected TA and salinity measured in each treatment tank (Table 1).

216

### 217 *Adult Exposure, Planulation, and Settlement*

218 Eight adult corals were exposed to each treatment beginning 06 May 2014. Two colonies  
219 died very early in the high pCO<sub>2</sub> treatment prior to June planulation, leaving n=6 in high  
220 pCO<sub>2</sub> and n=8 in ambient pCO<sub>2</sub>. A common garden approach (n = 2 tanks) was chosen to  
221 maximize the similarity of experimental conditions. During the 7-8 days of larval  
222 collection each month, adult corals were removed from the tanks and separated into  
223 individual ~4.5L bowls (one colony per bowl) with flowing treatment water (i.e., the  
224 same experimental conditions as the tanks) from ~5pm to 9am to isolate the larvae  
225 released from each colony (e.g., (Putnam & Gates, 2015). The flowing seawater flushed  
226 the buoyant larvae into 800 ml tripour beakers with 150 µm mesh bottoms and the

## Positive carryover effects in corals

227 number of larvae released per colony were counted during the months of June, July and  
228 August 2014.

229 July 2014 was the expected seasonal peak of larval release (Fig. 2), and the larvae  
230 collected during this time were used for the offspring reciprocal exposure experiments  
231 (Fig. 1c, d). Due to the variation in timing of gametogenesis, brooding, and the sexual or  
232 asexual origin of the planulae in *Pocillopora damicornis/acuta* (Permata, Kinzie, &  
233 Hidaka, 2000; Stimson, 1978; Stoddart, 1983; Stoddart & Black, 1985), it is not possible  
234 to definitively state the exact timing of exposure of the offspring gametes or planulae  
235 within the adults. Clarifying the timing and mechanisms of carryover effects (i.e. TGP or  
236 developmental acclimation) would require, for example, exposing the adults only prior to  
237 gametogenesis, only during gametogenesis, or only during brooding. Currently the  
238 reproductive biology of *Pocillopora damicornis/acuta*, complicates this assessment. In  
239 this case, we are testing the ecological context of TGP (e.g., (Torda et al., 2017) box 2),  
240 or carryover effects.

241 Groups of 16-20 larvae were tracked from each parent colony and placed in a  
242 200ml transparent acrylic chamber with 150 $\mu$ m mesh at each end. To increase replication  
243 and account for variability across release date, experiments were conducted on each day  
244 of larval release from 12-18 July 2014 on newly released larvae. Each chamber contained  
245 a 4.5 x 4.5 x 1cm terracotta brick tile that had been preconditioned on the reef for 1-2  
246 months. Conditions of pH on the fringing reef of Coconut Island in Kāneohe Bay can  
247 range from ~7.6 - 8.1 (Guadayol, Silbiger, Donahue, & Thomas, 2014; Silbiger,  
248 Guadayol, Thomas, & Donahue, 2014), so these tiles are not naïve to high pCO<sub>2</sub>. Further  
249 the major constituent was not crustose coralline algae and as such there should not be

## Positive carryover effects in corals

250 strong impacts of pCO<sub>2</sub> on the tiles themselves, thereby providing relatively equal  
251 competition dynamics between the newly settled spat and tile communities. The indirect  
252 effects of pCO<sub>2</sub> on substrate community, and therefore coral offspring settlement and  
253 growth, are important considerations in experimental design for interpretation of results  
254 (Albright and Langdon 2011). Chambers were placed into either ambient or high pCO<sub>2</sub>  
255 treatments and settlement and survivorship were assessed after 96h. Survivorship was  
256 calculated as the total number of living larvae (both swimming and settled) in the  
257 chamber divided by the initial number of larvae added. Settlement was counted as those  
258 larvae that had settled and metamorphosed to the chamber walls, mesh, or tile divided by  
259 the initial number of larvae added to the chamber.

### 260 *Spat exposure on Tiles*

261 After settlement and survivorship was assessed, new recruits were mapped on each tile  
262 and the tiles with settled spat were returned to the mesocosms of their settlement  
263 treatment (Figure 1, Figs. S1-S2). After both an additional month and then 6 months of  
264 total exposure, tiles were re-assessed under a dissecting scope to count survivorship  
265 (number of spat remaining alive relative to the initial amount added to the chamber).  
266 Growth of each spat was also measured by counting the number of polyps. Growth rate  
267 was calculated as: the (# of polyps - 1 primary polyp) / (# of days post settlement at  
268 month 1) for the first month's growth rate, and as the (# of polyps at month 6 - # of  
269 polyps at month 1) / (# of days between month 1 and month 6 measurements). Spat that  
270 were fused were counted as survivors, but were not used in the growth data analysis.  
271 Settlement tile was used as the level of replication to avoid non-independence of multiple  
272 spat on a tile.

## Positive carryover effects in corals

273

### 274 *Statistical Analysis*

275 To test if the timing of larval release differed between the control and treatment  
276 conditions at each sampling time-point, a two-sample Kolmogorov-Smirnov test was  
277 used and release by day was treated as a continuous variable (ks.test; stats package;(R  
278 Core Team, 2016). A generalized linear mixed effects model with binomial errors (lme4  
279 package; R Core Team, 2016) was used to test for differences in proportional settlement  
280 and survivorship between the treatment and control using a binomial distribution.  
281 Settlement data were analyzed with parental (Origin) and offspring (Secondary)  
282 treatments and their interaction as fixed effects and settlement tile as a random intercept.  
283 Survivorship and growth data were both measured at multiple time points and, thus, were  
284 modeled with the same fixed effects and interaction, but with a random intercept of  
285 settlement tile nested in time point. A model selection approach was applied and the final  
286 models were selected as those with the lowest delta AIC. Growth data were log  
287 normalized to meet model assumptions (i.e., for normal distribution) and growth data are  
288 plotted as back-transformed means and asymmetrical standard error. Full analytical  
289 details are available on GitHub  
290 ([https://github.com/hputnam/HI\\_Pdam\\_Parental/releases/tag/Version\\_20180508](https://github.com/hputnam/HI_Pdam_Parental/releases/tag/Version_20180508)) and  
291 Dryad (doi will be added upon acceptance).

292

### 293 **Results**

#### 294 *Acclimation Conditions*

## Positive carryover effects in corals

295 Corals were acclimated in tanks to fluctuating conditions (Fig. S1) similar to that on the  
296 fringing reefs of Kāneohe Bay, O'ahu, Hawai'i (Putnam et al., 2016). During the  
297 acclimation period, daily temperature ranged on average from 23.7 - 25.9°C (Fig. S1a).  
298 Between 06:00 - 19:00, Photosynthetically Active Radiation (PAR) ranged on average  
299 from 62 - 246  $\mu\text{mol s}^{-1} \text{m}^{-2}$  (Fig. S1e).

300

### 301 *Experimental Exposure*

302 Light and temperature varied over time within the experiment due to seasonal shifts (see  
303 supplemental Figure S1 for detailed description of tank conditions). During the adult  
304 pCO<sub>2</sub> exposure, mean temperature ranged from 26.3 - 27.9°C and 26.4 - 28.0°C in  
305 ambient and treatment tanks, respectively (Fig. S1), which was on average higher than  
306 the acclimation period due to seasonal warming. pH (NBS) ranged from 7.81 - 8.06 in  
307 ambient conditions and 7.51 - 7.74 in high pCO<sub>2</sub> conditions for the adult exposures.  
308 While this condition may be higher than IPCC pCO<sub>2</sub> predictions for open ocean  
309 conditions (Pachauri et al., 2014), lower and more variable pH is common for coastal and  
310 reef locations (Price, Martz, Brainard, & Smith, 2012; Rivest, Comeau, & Cornwall,  
311 2017). For example, pH conditions on the fringing reefs adjacent to Coconut Island can  
312 range from ~7.6 - 8.1 (Guadayol et al., 2014; Silbiger et al., 2014). Further modeling of  
313 the pH change in reef locations under future scenarios results in a 2.5 fold increase in reef  
314 pH variation projected with an offshore increase to 900  $\mu\text{atm}$  pCO<sub>2</sub> (Jury, Thomas,  
315 Atkinson, & Toonen, 2013). As such, our chosen pH conditions are ecologically relevant  
316 in terms of fluctuation and magnitude of potential pH change in the future in this dynamic  
317 reef location and do not represent extreme conditions. During the first month of larval

## Positive carryover effects in corals

318 exposure, pH ranged from 7.79 - 8.04 in ambient conditions and 7.49 - 7.74 in the high  
319 pCO<sub>2</sub> treatment, and temperature, on average, ranged from 27.0 - 28.5°C and 27.0 -  
320 28.4 °C, respectively (Fig. S1). Lastly, across the six months of juvenile exposure, pH  
321 ranged from 7.77 - 8.04 in ambient conditions and 7.52 - 7.75 in high pCO<sub>2</sub> conditions  
322 and daily temperature, on average, ranged from 25.7 - 27.1°C and 25.8 - 27.0°C,  
323 respectively (Fig. S1). Discrete measurements of carbonate chemistry reveal stable TA  
324 across the 10 months and strong differences in pH and pCO<sub>2</sub> between treatments (Table  
325 1), but as these discrete measurements reflect daylight sampling only, they underestimate  
326 the treatment differences in pH and temperature clearly portrayed in continuous  
327 measurements described above (Fig. S1).



328 **Table 1.** Carbonate chemistry parameters for the different phases of the experiment (Figure 1). (a) Adult exposure (05 May 14 - 17  
 329 August 14), (b) 1 Month of offspring exposure (12 July 14 - 19 August 14), and (c) 6 Months of offspring exposure (12 July 14 - 12  
 330 January 2015). Temperature, salinity, total alkalinity, and pH were measured (N=sample size in each treatment and time point), while  
 331 the remaining parameters of the carbonate system were calculated using seacarb as described in the methods.

332 *(a) Adult Exposures*

| Treatment | N  | Temp.<br>°C  | Salinity<br>psu | pH<br>Total | A <sub>T</sub><br>μmol kg <sup>-1</sup> | pCO <sub>2</sub><br>μmol kg <sup>-1</sup> | CO <sub>2</sub><br>μmol kg <sup>-1</sup> | HCO <sub>3</sub> <sup>-</sup><br>μmol kg <sup>-1</sup> | CO <sub>3</sub> <sup>2-</sup><br>μmol kg <sup>-1</sup> | DIC<br>μmol kg <sup>-1</sup> | Ω <sub>A</sub> |
|-----------|----|--------------|-----------------|-------------|-----------------------------------------|-------------------------------------------|------------------------------------------|--------------------------------------------------------|--------------------------------------------------------|------------------------------|----------------|
| Ambient   | 29 | 26.81 ± 0.12 | 33.9 ± 0.1      | 7.96 ± 0.02 | 2146 ± 5                                | 482 ± 20                                  | 13 ± 1                                   | 1705 ± 14                                              | 178 ± 6                                                | 1896 ± 10                    | 2.9 ± 0.1      |
| High      | 28 | 26.78 ± 0.12 | 33.9 ± 0.1      | 7.71 ± 0.02 | 2151 ± 5                                | 940 ± 38                                  | 26 ± 1                                   | 1878 ± 10                                              | 111 ± 4                                                | 2014 ± 7                     | 1.8 ± 0.1      |

333 *(b) Offspring 1 Month*

| Treatment | N | Temp.<br>°C  | Salinity<br>psu | pH<br>Total | A <sub>T</sub><br>μmol kg <sup>-1</sup> | pCO <sub>2</sub><br>μmol kg <sup>-1</sup> | CO <sub>2</sub><br>μmol kg <sup>-1</sup> | HCO <sub>3</sub> <sup>-</sup><br>μmol kg <sup>-1</sup> | CO <sub>3</sub> <sup>2-</sup><br>μmol kg <sup>-1</sup> | DIC<br>μmol kg <sup>-1</sup> | Ω <sub>A</sub> |
|-----------|---|--------------|-----------------|-------------|-----------------------------------------|-------------------------------------------|------------------------------------------|--------------------------------------------------------|--------------------------------------------------------|------------------------------|----------------|
| Ambient   | 8 | 27.16 ± 0.1  | 33.8 ± 0.2      | 7.9 ± 0.01  | 2138 ± 10                               | 557 ± 21                                  | 15 ± 1                                   | 1747 ± 13                                              | 158 ± 4                                                | 1920 ± 12                    | 2.6 ± 0.1      |
| High      | 8 | 27.11 ± 0.11 | 33.8 ± 0.1      | 7.71 ± 0.03 | 2142 ± 12                               | 945 ± 78                                  | 26 ± 2                                   | 1869 ± 23                                              | 111 ± 8                                                | 2005 ± 18                    | 1.8 ± 0.1      |

334 *(c) Offspring 6 Months*

| Treatment | N  | Temp.<br>°C  | Salinity<br>psu | pH<br>Total | A <sub>T</sub><br>μmol kg <sup>-1</sup> | pCO <sub>2</sub><br>μmol kg <sup>-1</sup> | CO <sub>2</sub><br>μmol kg <sup>-1</sup> | HCO <sub>3</sub> <sup>-</sup><br>μmol kg <sup>-1</sup> | CO <sub>3</sub> <sup>2-</sup><br>μmol kg <sup>-1</sup> | DIC<br>μmol kg <sup>-1</sup> | Ω <sub>A</sub> |
|-----------|----|--------------|-----------------|-------------|-----------------------------------------|-------------------------------------------|------------------------------------------|--------------------------------------------------------|--------------------------------------------------------|------------------------------|----------------|
| Ambient   | 15 | 26.90 ± 0.35 | 33.8 ± 0.1      | 7.97 ± 0.04 | 2135 ± 7                                | 493 ± 38                                  | 13 ± 1                                   | 1688 ± 35                                              | 180 ± 13                                               | 1882 ± 23                    | 2.9 ± 0.2      |
| High      | 15 | 26.92 ± 0.35 | 33.8 ± 0.1      | 7.73 ± 0.03 | 2135 ± 7                                | 923 ± 70                                  | 25 ± 2                                   | 1853 ± 20                                              | 114 ± 8                                                | 1992 ± 15                    | 1.8 ± 0.1      |

## Positive carryover effects in corals

### 335 *Planulation and Settlement*

336 Planulae release was monitored on lunar days ~16-24 for the months of June, July, and  
337 August, as planulation has been reported to occur following the full moon (lunar day  
338 ~15) for *P. damicornis* in Hawai'i (Jokiel, 1985; Richmond & Jokiel, 1984). A clear  
339 peak in planulation was observed in July, with lowest release in August (Fig. 2). There  
340 was no significant difference in the timing of planulation between treatments in either  
341 June (Fig. 2a;  $P > 0.05$ ) or August (Fig. 2c;  $P > 0.05$ ). The general pattern suggested a  
342 shift in timing of planulation between treatments (Fig. 2), with a delay in release more  
343 prominent in the high pCO<sub>2</sub> condition in July (Fig. 2b;  $D = 0.625$ ,  $P = 0.087$ ).

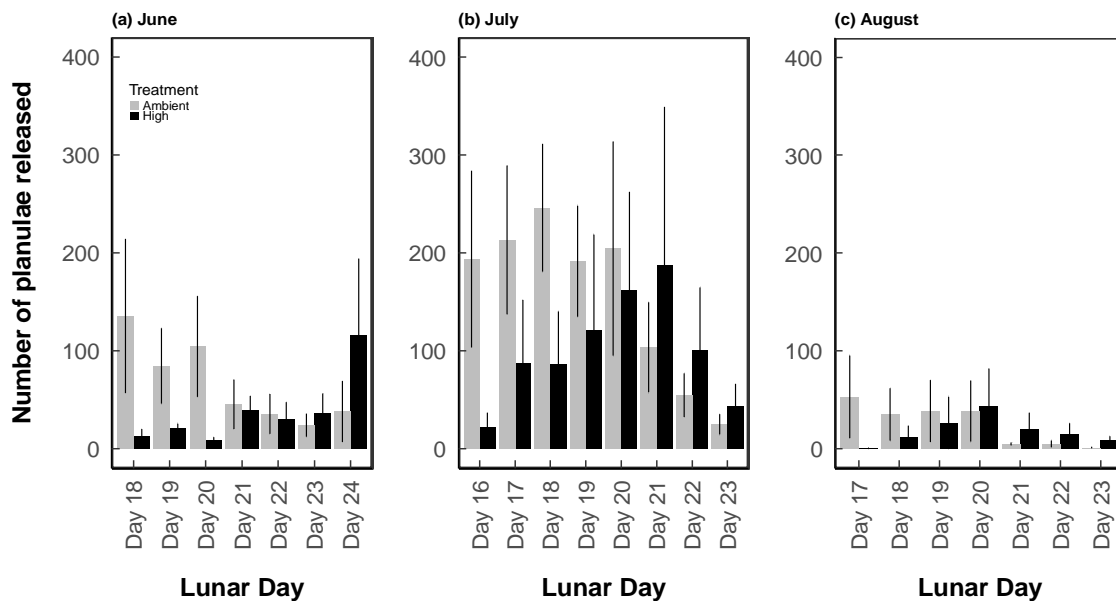

**Figure 2. Average larval release per coral colony.** Planulae release as a function of lunar day in (a) June, (b) July, and (c) August in from adult colonies exposed to ambient pCO<sub>2</sub> (n=8) and adult colonies exposed to high pCO<sub>2</sub> (n=6).

344 Offspring from high CO<sub>2</sub>-exposed parents displayed significantly higher survivorship  
345 following 96h in the settlement chambers ( $P < 0.016$  Table S1a), supporting positive

## Positive carryover effects in corals

346 carryover effects. This increase in offspring survival from parents exposed to elevated  
347 pCO<sub>2</sub> was approximately equal in both offspring treatments at time 0, with 14.5% and  
348 15.1% greater survivorship in the ambient and high offspring treatments, respectively  
349 (Fig. 3a). The settled spat from parents preconditioned to high pCO<sub>2</sub> also showed greater  
350 survivorship in both offspring treatments after one month in the reciprocal exposures  
351 (Table S1a), with preconditioned offspring having 27.1% greater survivorship at ambient  
352 offspring exposure conditions and 16.6% at high pCO<sub>2</sub> exposure (Fig. 3b). After 6  
353 months of reciprocal exposure, parental exposure to high pCO<sub>2</sub> enhanced offspring  
354 survivorship by 13.6% in ambient offspring exposures, relative to spat from adults that  
355 underwent ambient preconditioning. Offspring from high pCO<sub>2</sub> parents displayed reduced  
356 survivorship (7.7%) in high offspring exposure relative to spat from adults  
357 preconditioned to ambient (Fig. 3c, Table S1a). Offspring exposure to high pCO<sub>2</sub> also led  
358 to lower survivorship regardless of parental preconditioning treatment (Table S1a).  
359 Averaged across parental exposures, survivorship decreased with offspring exposure to  
360 elevated pCO<sub>2</sub> by 26.1% at time 0, 24.5% at month 1 and 59.9% at month 6. Survivorship  
361 declined significantly over time ( $P < 0.001$ , Table S1a), with survivorship as low as 4.6%  
362 of the initial planulae by the final time point.

363 Planulae settlement was highest when parents were exposed to elevated pCO<sub>2</sub>  
364 ( $P = 0.021$ ; Table S1b; Fig. 3d); settlement was enhanced by 17.6% and 11% for planulae  
365 settling in ambient and high pCO<sub>2</sub> offspring treatments, respectively. Despite this overall  
366 enhanced settlement of planulae from high pCO<sub>2</sub> parents, mean settlement was  
367 significantly lower overall (26.1%) in the high pCO<sub>2</sub> offspring treatments ( $P < 0.001$ ;  
368 Table S1b), regardless of parental pCO<sub>2</sub> exposure (Fig. 3d).

## Positive carryover effects in corals

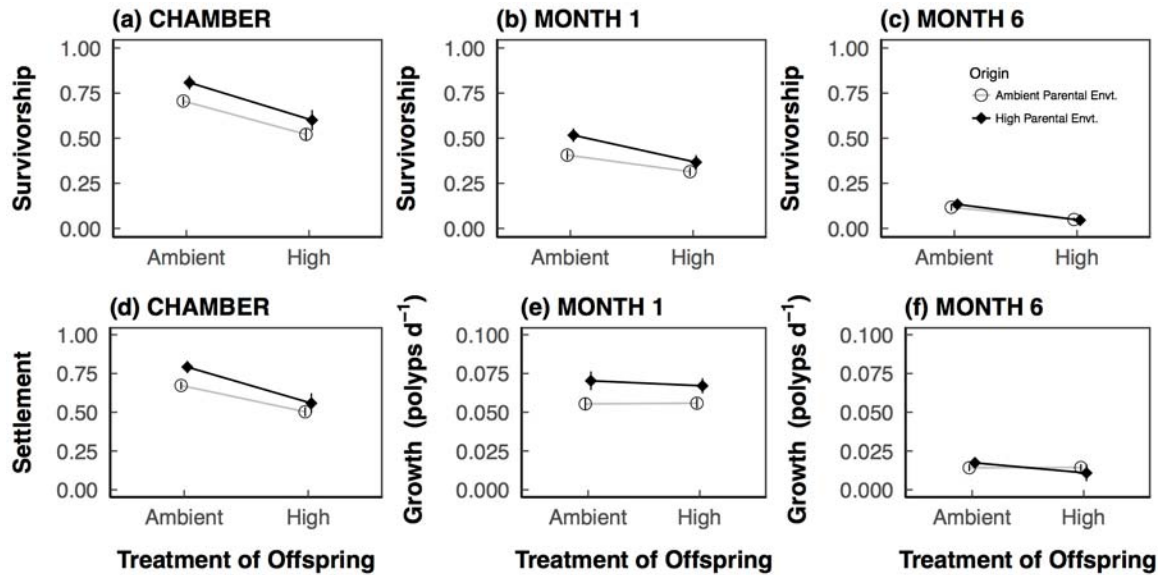

369

370 **Figure 3. Parental preconditioning to high pCO<sub>2</sub> enhances offspring performance.**  
371 Reaction norm plots for (a) survivorship in the chambers, (b) survivorship at month 1, (c)  
372 survivorship at month 6, (d) settlement at time 0, (e) growth rate at month 1, and (f)  
373 growth rate at month 6. Points display data (mean±sem), while lines indicate only the  
374 direction of response. Tile sample sizes for survivorship and settlement time 0, month 1  
375 and month 6 and growth at month 1 ranged from 7-36 (see Table S1). Growth rates were  
376 log transformed for analyses and figure displays back-transformed growth rate data.  
377

378 Lastly, a trend for an Origin\*Time interaction (P=0.056) was observed in spat growth,  
379 where differences in growth with parental origin were apparent at month 1 (growth was  
380 on average 1.3-fold higher in offspring from parents preconditioned to high pCO<sub>2</sub>; Fig.  
381 3e), but not at month 6 (Fig. 3f). Time also had a significant effect on growth, where by  
382 the end of the experiment, at 6 months post release, growth rates were significantly lower  
383 than at month 1 (P<0.0001, Fig. 3f).

384

## 385 Discussion

386 Here we present the first ecological assessment of trans-generational or carryover effects  
387 in reef-building corals. In our study, the ecological and fitness-related response of coral  
388 offspring was enhanced dependent on response and life-stage when their parents were

## Positive carryover effects in corals

389 exposed to a high pCO<sub>2</sub> environment, with carryover effects lasting into the juvenile  
390 stage. Projections for future reef persistence are dire (Veron et al., 2009), but many do  
391 not incorporate adaptation or acclimatization (Van Hooidonk, Maynard, & Planes, 2013),  
392 likely over or under-estimating climate change effects for some stressors. When  
393 adaptation and acclimatization are considered, it is clear the trajectories differ from the  
394 worst-case scenarios (Ainsworth et al., 2016; Donner, Skirving, Little, Oppenheimer, &  
395 Hoegh-Guldberg, 2005; Logan, Dunne, Eakin, & Donner, 2014). Our work provides  
396 evidence to support the importance of the role of acclimatory processes in eco-  
397 evolutionary thinking in an era of climate change and encourage the examination of  
398 mechanisms such as hormesis and epigenetics (e.g., Costantini, 2014; Torda et al., 2017).

399

### 400 *Potential for tuning of reproductive timing*

401 Our multi-life stage perspective identifies carryover effects of adult stressor exposure,  
402 with reproductive and offspring consequences. Shifts in reproductive timing can have  
403 significant consequences for offspring settlement conditions. It is possible that “bet-  
404 hedging” or environmental tuning by the parents may result in release of larvae timed to  
405 favorable conditions. For example, a shift in reproductive timing of coral planulation with  
406 change in temperature across season was recently documented (Fan et al., 2017). In this  
407 case, seasonal acclimatization in the parents resulted in change in summer planulae  
408 release timing, which minimizes planulae release during strong, likely stressful,  
409 upwelling-induced temperature fluctuations of ~10°C (Lee, Chao, Fan, Wang, & Liang,  
410 1997). Adult tuning of larval release of offspring is also possible in our experiment.  
411 Kāneohe Bay is a semi-enclosed embayment that has fluctuations in physical

## Positive carryover effects in corals

412 conditions as a function of tidal cycle. Specifically, diurnal pCO<sub>2</sub> fluctuations are greatest  
413 when tidal fluctuation is the lowest (Guadayol et al., 2014; Putnam, 2012; Silbiger et al.,  
414 2014) in the shallow fringing reefs of Kāneohe Bay. A delay in the peak of planulation  
415 from the adults preconditioned to high pCO<sub>2</sub>, would then correspond to the timing of  
416 lower daily tidal ranges  
417 (<https://tidesandcurrents.noaa.gov/stationhome.html?id=1612480>) and thus higher pCO<sub>2</sub>  
418 fluctuations that are more similar to the high pCO<sub>2</sub> adult conditions. Another hypothesis  
419 that could contribute to a shift in larval release under high pCO<sub>2</sub> condition is adult or  
420 offspring energetic constraints. Delay in release could indicate energetic costs to  
421 maintaining adult calcification and homeostasis (Stumpp et al., 2012), potentially  
422 resulting in decreased parental investment, or increased development time necessary in  
423 offspring (Stumpp, Wren, Melzner, Thorndyke, & Dupont, 2011). Further, low pH can  
424 influence development processes such as sperm performance, fertilization success, and  
425 developmental normalcy and timing (Albright, 2011; Byrne & Przeslawski, 2013).

426       Given the trend for a shift in the timing of planulation during July when our  
427 offspring experiment was completed, it could be hypothesized that parental effects in the  
428 reciprocal exposure are due to slight differences in the larval cohorts by day of release  
429 (Cumbo et al., 2013; Cumbo, Fan, & Edmunds, 2012; Putnam et al., 2010; Rivest &  
430 Hofmann, 2015). For example, peaks in *Symbiodinium* density and photophysiology, and  
431 larval size, are positively correlated to peak larval release in *Pocillopora damicornis* in  
432 Taiwan (Putnam et al., 2010). These differences in physiology by day of release also  
433 translate to variation in susceptibility to changing temperature and pH in *P. damicornis*  
434 (Cumbo et al., 2013; Rivest & Hofmann, 2015). The impact of day of release in our case

## Positive carryover effects in corals

435 is likely to be minimal, given the experiment was not conducted on a single day's larval  
436 pool, but over 7 consecutive days (Fig. 2), better representing the full range of larval  
437 phenotypes from *P. damicornis/acuta*.

438

### 439 *Importance of carryover effects for corals*

440 Our work provides further evidence that parental environment matters to offspring  
441 performance in this brooding coral species, *Pocillopora acuta*. While ~1 month of  
442 exposure to increased temperature and low pH resulted in TGP in this same species  
443 (Putnam & Gates, 2015), in our current study with exposure to only OA, reaction norms  
444 were primarily parallel, with enhanced performance in those preconditioned. This may  
445 suggest that exposure to increased temperature (or the combination of temperature and  
446 OA) has more profound, or mechanistically different impacts than OA on processes  
447 involved in parental contributions or developmental acclimation (e.g., Byrne, 2012). The  
448 enhanced growth of *P. acuta* juveniles under low pH is unexpected given the commonly  
449 detrimental effect of ocean acidification on coral calcification (Kroeker, Kordas, Crim, &  
450 Singh, 2010). *Pocillopora damicornis* has, however displayed variability in sensitivity  
451 of calcification in response to OA, from negative (Putnam et al., 2016) to no effects on  
452 growth (Comeau et al., 2014; Comeau, Edmunds, Spindel, & Carpenter, 2013). For  
453 instance, ocean acidification did not impact recruitment of *P. damicornis* larvae to the  
454 sides of treatment tanks in a mesocosm study also in Kāneohe Bay (Jokiel et al., 2008).  
455 Furthermore, physiology at the larvae stage was not strongly affected by OA (Putnam et  
456 al 2013), but was affected more so by increased temperature. Enhanced calcification in a  
457 trans-generational context has been measured in another marine invertebrate, where

## Positive carryover effects in corals

458 higher shell growth rates in offspring of the Manila clam following exposure of the  
459 parents to low pH have been observed (Zhao et al., 2018; Zhao, Schöne, Mertz-Kraus, &  
460 Yang, 2017). This positive carryover effect for growth in another marine calcifier  
461 supports our findings here with *Pocillopora acuta*, with implications for the presence and  
462 importance of TGP beyond a single coral species.

### 463 ***Potential mechanisms underlying parental effects***

464 Several hypotheses may account for the parental contribution to enhanced  
465 settlement, survivorship, and growth we documented. It is possible that adults manipulate  
466 the investment in their offspring in the form of *Symbiodinium* communities (Padilla-  
467 Gamiño, Pochon, Bird, Concepcion, & Gates, 2012), microbiome (Sharp, Distel, & Paul,  
468 2012), size, protein, lipids, or carbohydrates (Hartmann, Marhaver, Chamberland, Sandin,  
469 & Vermeij, 2013). Further the role of mitochondrial performance has been posited as a  
470 mechanism of rapid adaptation in coral larvae (Dixon et al., 2015) and mitochondrial  
471 performance has been linked to parental environment in the trans-generational  
472 acclimatization of marine worms (Gibbin et al., 2017). These mechanisms could provide  
473 metabolic boosts or conversely detriments during this energetically demanding life stage  
474 (Edmunds, Cumbo, & Fan, 2013); e.g., the presence of clade D symbionts reduces  
475 growth in coral juveniles (Little, Van Oppen, & Willis, 2004). DNA methylation and  
476 other epigenetic mechanisms linked to gene expression regulation (Putnam et al., 2016;  
477 Putnam & Gates, 2015; Torda et al., 2017) could also provide a mechanism of heritable  
478 cross-generational priming. Identification of differential DNA methylation patterns  
479 between the offspring of exposed and unexposed oysters is an initial line of evidence for  
480 an epigenetic role in TGP for marine calcifiers (Rondon et al., 2017). The minute



## Positive carryover effects in corals

481 number of methylation changes and the lack of direct impact on RNA transcript  
482 abundance or differential splicing (Rondon et al., 2017), however, illustrates how  
483 complex these mechanisms can be. While differential provisioning of planulae  
484 symbiotically, energetically, and epigenetically is possible, the goal of examining  
485 ecological effects on the process of recruitment precluded destructive sampling for such  
486 hypotheses in our study, but they remain important considerations in future work.

487 Brooded embryos may experience developmental acclimation while growing  
488 within the parental polyp (Putnam & Gates, 2015). It is possible that low pH in the  
489 gastrovascular cavity (GVC) at the site of development could condition planulae for low  
490 pH when released. This hypothesis would account for the differences seen in our study  
491 between ambient and low pH preconditioned parents if the GVCs were modified  
492 differently between treatments to retain a treatment offset. To date, limited data are  
493 available for GVC pH under a variety of conditions (Agostini et al., 2011; Cai et al.,  
494 2016). The data available suggest both a high pH and low pH within the GVC and  
495 associated mesenteries (Cai et al., 2016), with no uniform picture of what planulae within  
496 the polyp are exposed to relative to external conditions. Further work with multiple coral  
497 species is necessary to disentangle the role of developmental acclimation from TGP,  
498 including experiments focused on the magnitude and timing of signals that will induce  
499 carryover effects and exposures through the F1 and F2 generation (Torda et al., 2017).

500

### 501 *Environmental hardening through hormetic priming*

502 Acclimatization occurs through short-term compensatory processes including modulation  
503 of biochemical activity and gene expression in response to external stimuli, occurring on

## Positive carryover effects in corals

504 daily, seasonal, and annual scales, within a generation, and across a generation. Often  
505 implicit in the usage of the term acclimatization is the inference that acclimatory  
506 processes are beneficial and fully compensatory, *sensu* the Beneficial Acclimation  
507 Hypothesis (BAH; Huey, Berrigan, Gilchrist, & Herron, 1999), but acclimatization is not  
508 always adaptive (Edmunds, 2014; Edmunds & Gates, 2008; Huey et al., 1999). One  
509 conceptual explanation for inconsistency of BAH is the framework of hormetic priming  
510 (Costantini, 2014; Costantini, Metcalfe, & Monaghan, 2010), which deserves  
511 consideration with regards to explaining patterns of TGP. Hormesis is defined as the  
512 stimulation of function through mild exposure(s) (Southam & Ehrlich, 1943). Hormetic  
513 priming thus occurs when exposure to a sub-lethal stressor results in stimulatory response  
514 to increasing levels of a condition (e.g., Fig. 4), for example, as we have documented  
515 here in the enhanced performance of larvae of *Pocillopora acuta* following parental  
516 preconditioning. Hormesis is a biphasic response and therefore does not necessitate  
517 positive acclimation to all future exposures (Fig. 4).

518         Hormetic priming as a mechanism of acclimatization could explain both the  
519 beneficial and detrimental effects of increased temperature that have been documented in  
520 certain types of repeated exposures (Ainsworth et al., 2016; Brown et al., 2000; Grottoli  
521 et al., 2014), as well as variability in performance. For example, Ainsworth et al., (2016)  
522 identified a “protective trajectory” of sea surface temperatures (SST) that corals  
523 experienced, which lead to acquired thermal tolerance in *Acropora aspera*. Conversely a  
524 “repetitive bleaching trajectory”, with high frequency bleaching events that lack recovery  
525 time resulted in substantial symbiotic cell loss, bleaching, and mortality (Ainsworth et al.,  
526 2016). Here it is likely these responses are on differing sides of the zero equivalence

## Positive carryover effects in corals

527 point in terms of the biphasic nature of hormetic processes (Y axis in Fig. 4A; (Costantini  
528 et al., 2010; Lushchak, 2014). An example of hormetic priming in corals would be that of  
529 mild ROS exposure resulting in protein expression priming, thereby reducing the ROS  
530 damage in subsequent events (Brown, Downs, Dunne, & Gibb, 2002). Beyond  
531 antioxidant genes, frontloading, or the constitutive up-regulation of expression of  
532 canonical heat stress genes in *Acropora hyacinthus* samples from the high thermal  
533 variability pool in American Samoa, could be another outcome of hormetic priming, with  
534 implications for the thermal tolerance of those primed individuals (Barshis et al., 2013).

535

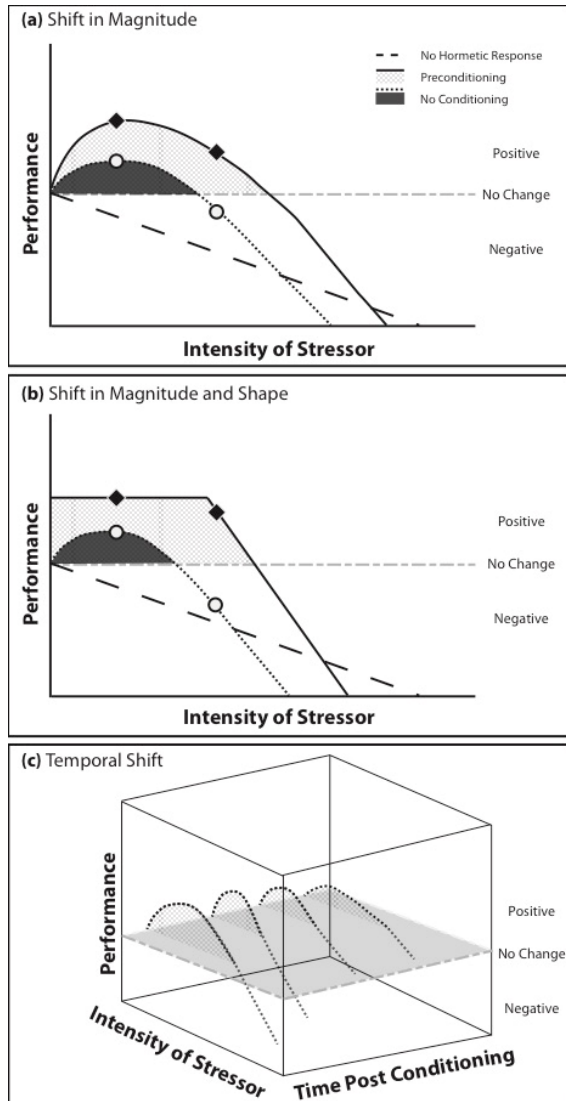

**Figure 4. Hormeric priming may contribute to magnitude, pattern, and temporal variation in the benefits of TGP.** The dashed line indicates the result of no hormeric priming, the gray dashed line is no change, the dotted line (black area) indicates a hormeric response with no conditioning, while the solid line (hashed area) indicates the hormeric response with preconditioning (Constantini et al., 2010; Lushchak 2014). Shaded areas indicate the hormeric zones, where the stimulation of performance from the increasing stressor is above the line of no change. Variation in the intensity, duration, and life stage of prior exposure may shift the A) magnitude, or B) shape of the hormeric zone. For example, in sessile benthic organisms, carryover effects from parental exposure may result in an enhanced hormeric zone relative to no conditioning. Further there may be C) temporal constraints on hormeric conditioning. For example, the hormeric zone may differ from parental exposure versus developmental exposure, or as in the case of our study, display a decline in positive carryover effects with increasing time post conditioning (as visualized by the temporal shift in hormeric zone).

## Positive carryover effects in corals

536 Corals in our study displayed life stage-dependent TGP. Despite the enhancement  
537 in performance seen in early stages, the parental effects of preconditioning to high pCO<sub>2</sub>  
538 are absent in the offspring by 6 months post release. While maintenance of maternal  
539 effects may be expected in short lived organisms, as generation time increases there is a  
540 greater potential mismatch between parental and offspring conditions (e.g., Fig. S1). This  
541 change in parental effects over time is not unexpected due to potential maladaptive  
542 tradeoffs (Burgess & Marshall, 2014), especially the case in long-lived corals (Torda et  
543 al., 2017). Seasonal, annual, and decadal environmental changes likely elicit tradeoffs  
544 between the early life stage performance benefits of TGP and the costs of TGP the  
545 organism may incur later in life. For example, maternal exposure of soil arthropods to  
546 high temperatures resulted in increased thermal resistance at the juvenile stage, but later  
547 drove reduced F1 fecundity (Zizzari & Ellers, 2014). Further the expectation of positive  
548 TGP is linked to the predictability of the stressor (e.g., anticipatory parental effects;  
549 APE's; Burgess & Marshall, 2014; Donelson et al., 2017). Specifically, TGP through  
550 hormetic priming would likely be optimized by high environmental autocorrelation (i.e.,  
551 a strong match between parent and offspring conditions would result in extended  
552 enhancement). The greater the temporal shift from the parental environment (e.g., 6  
553 months here Fig. S1) the less likely there is to be a benefit from parental enhancement  
554 and the more likely within generation priming would become important (e.g., Fig. 4C).  
555 Seasonal changes in physical parameters would then be expected to result in a loss of  
556 benefit from TGP as pH continues to change, in a biphasic fashion (Fig. 4C).  
557 Additionally, with respect to overall growth rates, the growth from months 2-6 would be  
558 expected to decline due to seasonal effects associated with decreases in temperature and

## Positive carryover effects in corals

559 light in the winter months (Fig. S1; Fitt, McFarland, Warner, & Chilcoat, 2000; Thornhill  
560 et al., 2011). The temporal transience of parental effects documented in our study argues  
561 that for parental effects to translate into long term “memory” more constant  
562 environmental and biological feedbacks are necessary (Ptashne, 2013).

563

### 564 *Implications for reef-building corals*

565 Experiments designed to examine TGP and carryover effects provide a glimmer of hope  
566 for coral reef organisms that acclimatization may act as a buffer against a rapidly  
567 changing climate (Putnam & Gates, 2015; Torda et al., 2017). Further experiments are  
568 necessary to distinguish between true TGP, parental effects, and developmental  
569 acclimation, and their underlying mechanisms. This could be achieved in spawning coral  
570 systems, or by manipulating the timing of exposure in the brooding coral system to target  
571 isolated stages (i.e., adult, gametogenesis, brooding, and larval). Additionally, tests of the  
572 stability and later-life tradeoffs of TGP, as well as mechanisms of environmental  
573 “memory” through aspects such as mitochondrial function (Gibbin et al., 2017), DNA  
574 methylation (Putnam et al., 2016), or microbiome inheritance (Putnam, Barott, Ainsworth,  
575 & Gates, 2017; Webster & Reusch, 2017) will unveil the complex contributions of the  
576 holobiont partners to meta-organism function and acclimatization potential.

577 Our work challenges the paradigm of inevitable coral decline due to rapid climate  
578 change by identifying ecologically-relevant beneficial parental effects in offspring, in  
579 response to adult preconditioning to ocean acidification. We suggest hormesis, or  
580 environmental priming may conceptually explain enhanced tolerance and performance  
581 seen in acclimatization studies, as well as explaining the lack of a ubiquitous beneficial

## Positive carryover effects in corals

582 acclimation due to the biphasic nature of hormesis. With regards to a conservation and  
583 management actions (i.e. assisted evolution; van Oppen et al., 2017; van Oppen, Oliver,  
584 Putnam, & Gates, 2015), environmental priming is not a one-size-fits all phenomenon  
585 (i.e., does not always confer beneficial acclimation). Instead conditioning methods would  
586 necessitate a Goldilocks approach, as variation in cellular conditions and physiology  
587 between species requires a variety of exposures for optimal performance outcomes  
588 (Putnam et al., 2017). It is not clear, however, if the duration of the benefits would extend  
589 far beyond the exposures, as phenotype-environment mismatches increase with season  
590 and anthropogenic effects. The performance and fitness tradeoffs of acclimatization,  
591 hormetic triggers, and heritability of potential epigenetic feedbacks present promising  
592 areas of further study with respect to carryover effects and the ecological and  
593 evolutionary trajectories of reef-building corals.

594

### 595 **Acknowledgements**

596 This work was supported by funding from NSF OCE-PRF 1323822 to HMP, and NSF  
597 EPS-0903833, and NSF URM 0829272. We would like to thank Rashim Khadka and the  
598 HIMB facilities staff for their assistance in this work and N. Silbiger, M. Iacchei for  
599 constructive comments on the manuscript. This is HIMB contribution number xxx and  
600 SOEST contribution number XXX.

601

602

603

604

605 **References**

- 606 Agostini, S., Suzuki, Y., Higuchi, T., Casareto, B. E., Yoshinaga, K., Nakano, Y., &  
607 Fujimura, H. (2011). Biological and chemical characteristics of the coral gastric  
608 cavity. *Coral Reefs*, 31(1), 147–156. <https://doi.org/10.1007/s00338-011-0831-6>
- 609 Ainsworth, T. D., Heron, S. F., Ortiz, J. C., Mumby, P. J., Grech, A., Ogawa, D., Eakin,  
610 C.M., Leggat, W. (2016). Climate change disables coral bleaching protection on  
611 the Great Barrier Reef. *Science*, 352(6283), 338–342.
- 612 Albright, R. (2011). Reviewing the effects of ocean acidification on sexual reproduction  
613 and early life history stages of reef-building corals. *Journal of Marine Biology*,  
614 2011.
- 615 Baird, A. H., Guest, J. R., & Willis, B. L. (2009). Systematic and biogeographical  
616 patterns in the reproductive biology of scleractinian corals. *Annual Review of*  
617 *Ecology, Evolution, and Systematics*, 40, 551–571.
- 618 Barshis, D. J., Ladner, J. T., Oliver, T. A., Seneca, F. O., Traylor-Knowles, N., &  
619 Palumbi, S. R. (2013). Genomic basis for coral resilience to climate change.  
620 *Proceedings of the National Academy of Sciences*, 110(4), 1387–1392.
- 621 Bishop, R. C., Chapman, D. J., Kanninen, B. J., Krosnick, J. A., Leeworthy, B., & Meade,  
622 N. F. (2011). *Total Economic Value for Protecting and Restoring Hawaiian Coral*  
623 *Reef Ecosystems: Final Report*. Silver Spring, MD: NOAA Office of National  
624 *Marine Sanctuaries, Office of Response and Restoration, and Coral Reef*  
625 *Conservation Program*. NOAA Technical Memorandum CRCP 16.
- 626 Brown, B. E., & Cossins, A. R. (2011). The potential for temperature acclimatisation of  
627 reef corals in the face of climate change. In *Coral Reefs: An Ecosystem in*  
628 *Transition* (pp. 421–433). Springer.



## Positive carryover effects in corals

- 629 Brown, B. E., Downs, C. A., Dunne, R. P., & Gibb, S. W. (2002). Exploring the basis of  
630 thermotolerance in the reef coral *Goniastrea aspera*. *Marine Ecology Progress*  
631 *Series*, 242, 119–129.
- 632 Brown, B. E., Dunne, R. P., Goodson, M. S., & Douglas, A. E. (2000). Bleaching  
633 patterns in reef corals. *Nature*, 404(6774), 142.
- 634 Burgess, S. C., & Marshall, D. J. (2014). Adaptive parental effects: the importance of  
635 estimating environmental predictability and offspring fitness appropriately. *Oikos*,  
636 123(7), 769–776.
- 637 Byrne, M. (2012). Global change ecotoxicology: identification of early life history  
638 bottlenecks in marine invertebrates, variable species responses and variable  
639 experimental approaches. *Marine Environmental Research*, 76, 3–15.
- 640 Byrne, M., & Przeslawski, R. (2013). Multistressor impacts of warming and acidification  
641 of the ocean on marine invertebrates' life histories. *Integrative and Comparative*  
642 *Biology*, 53(4), 582–596.
- 643 Cai, W.-J., Ma, Y., Hopkinson, B. M., Grottoli, A. G., Warner, M. E., Ding, Q., Hu, X.,  
644 Yuan, X., Schoepf, V., Xu, H., Han, C., Melman, T.F., Hoadley, K.D., Pettay, D.  
645 T., Matsui Y., Baumann, J.H., Levas, J.H., Ying Y., Wang, Y. (2016).  
646 Microelectrode characterization of coral daytime interior pH and carbonate  
647 chemistry. *Nature Communications*, 7, 11144.
- 648 Chakravarti, L. J., Jarrold, M. D., Gibbin, E. M., Christen, F., Massamba-N'Siala, G.,  
649 Blier, P. U., & Calosi, P. (2016). Can trans-generational experiments be used to  
650 enhance species resilience to ocean warming and acidification? *Evolutionary*  
651 *Applications*, 9(9), 1133–1146. <https://doi.org/10.1111/eva.12391>

## Positive carryover effects in corals

- 652 Chevin, L.-M., Collins, S., & Lefèvre, F. (2013). Phenotypic plasticity and evolutionary  
653 demographic responses to climate change: taking theory out to the field.  
654 *Functional Ecology*, 27(4), 967–979.
- 655 Chua, C. M., Leggat, W., Moya, A., & Baird, A. H. (2013). Temperature affects the early  
656 life history stages of corals more than near future ocean acidification. *Marine*  
657 *Ecology Progress Series*, 475, 85–92.
- 658 Chua, C.-M., Leggat, W., Moya, A., & Baird, A. H. (2013). Near-future reductions in pH  
659 will have no consistent ecological effects on the early life-history stages of reef  
660 corals. *Marine Ecology Progress Series*, 486, 143–151.
- 661 Coles, S. L., & Brown, B. E. (2003). Coral bleaching—capacity for acclimatization and  
662 adaptation. *Advances in Marine Biology*, 46, 183–223.
- 663 Comeau, S., Carpenter, R. C., Nojiri, Y., Putnam, H. M., Sakai, K., & Edmunds, P. J.  
664 (2014). Pacific-wide contrast highlights resistance of reef calcifiers to ocean  
665 acidification. *Proceedings of the Royal Society of London B: Biological Sciences*,  
666 281(1790), 20141339.
- 667 Comeau, S., Edmunds, P. J., Spindel, N. B., & Carpenter, R. C. (2013). The responses of  
668 eight coral reef calcifiers to increasing partial pressure of CO<sub>2</sub> do not exhibit a  
669 tipping point. *Limnology and Oceanography*, 58(1), 388–398.
- 670 Costantini, D. (2014). Does hormesis foster organism resistance to extreme events. *Front*  
671 *Ecol Environ*, 12, 209–210.
- 672 Costantini, D., Metcalfe, N. B., & Monaghan, P. (2010). Ecological processes in a  
673 hormetic framework. *Ecology Letters*, 13(11), 1435–1447.  
674 <https://doi.org/10.1111/j.1461-0248.2010.01531.x>

## Positive carryover effects in corals

- 675 Costanza, R., de Groot, R., Sutton, P., van der Ploeg, S., Anderson, S. J., Kubiszewski, I.,  
676 ... Turner, R. K. (2014). Changes in the global value of ecosystem services.  
677 *Global Environmental Change*, 26, 152–158.
- 678 Cumbo, V. R., Edmunds, P. J., Wall, C. B., & Fan, T.-Y. (2013). Brooded coral larvae  
679 differ in their response to high temperature and elevated pCO<sub>2</sub> depending on the  
680 day of release. *Marine Biology*, 160(11), 2903–2917.
- 681 Cumbo, V. R., Fan, T.-Y., & Edmunds, P. J. (2012). Physiological development of  
682 brooded larvae from two pocilloporid corals in Taiwan. *Marine Biology*, 159(12),  
683 2853–2866.
- 684 Dickson, A. G., Sabine, C. L., & Christian, J. R. (2007). Guide to best practices for ocean  
685 CO<sub>2</sub> measurements. *PICES Special Publication 3*.
- 686 Dixon, G. B., Davies, S. W., Aglyamova, G. V., Meyer, E., Bay, L. K., & Matz, M. V.  
687 (2015). Genomic determinants of coral heat tolerance across latitudes. *Science*,  
688 348(6242), 1460–1462.
- 689 Donelson, J. M., Salinas, S., Munday, P. L., & Shama, L. N. S. (2017). Transgenerational  
690 plasticity and climate change experiments: Where do we go from here? *Global*  
691 *Change Biology*. <https://doi.org/DOI: 10.1111/gcb.13903>
- 692 Doney, S. C., Fabry, V. J., Feely, R. A., & Kleypas, J. A. (2009). Ocean Acidification:  
693 The Other CO<sub>2</sub> Problem. *Annual Review of Marine Science*, 1(1), 169–192.  
694 <https://doi.org/10.1146/annurev.marine.010908.163834>
- 695 Donner, S. D., Skirving, W. J., Little, C. M., Oppenheimer, M., & Hoegh-Guldberg, O. V.  
696 E. (2005). Global assessment of coral bleaching and required rates of adaptation  
697 under climate change. *Global Change Biology*, 11(12), 2251–2265.

## Positive carryover effects in corals

- 698 Drupp, P., De Carlo, E. H., Mackenzie, F. T., Bienfang, P., & Sabine, C. L. (2011).  
699 Nutrient inputs, phytoplankton response, and CO<sub>2</sub> variations in a semi-enclosed  
700 subtropical embayment, Kaneohe Bay, Hawaii. *Aquatic Geochemistry*, 17(4–5),  
701 473–498.
- 702 Dufault, A. M., Cumbo, V. R., Fan, T.-Y., & Edmunds, P. J. (2012). Effects of diurnally  
703 oscillating pCO<sub>2</sub> on the calcification and survival of coral recruits. *Proceedings of*  
704 *the Royal Society of London B: Biological Sciences*, rspb20112545.
- 705 Edmunds, P. J. (2014). Is acclimation beneficial to scleractinian corals, *Porites spp.*?  
706 *Marine Biology*, 161(7), 1531–1542. <https://doi.org/10.1007/s00227-014-2438-2>
- 707 Edmunds, P. J., Cumbo, V. R., & Fan, T.-Y. (2013). Metabolic costs of larval settlement  
708 and metamorphosis in the coral *Seriatopora caliendrum* under ambient and  
709 elevated pCO<sub>2</sub>. *Journal of Experimental Marine Biology and Ecology*, 443, 33–38.
- 710 Edmunds, P. J., & Gates, R. D. (2008). Acclimatization in tropical reef corals. *Marine*  
711 *Ecology Progress Series*, 361, 307–310.
- 712 Erez, J., Reynaud, S., Silverman, J., Schneider, K., & Allemand, D. (2011). Coral  
713 calcification under ocean acidification and global change. In *Coral reefs: an*  
714 *ecosystem in transition* (pp. 151–176). Springer.
- 715 Fabricius, K. E., Langdon, C., Uthicke, S., Humphrey, C., Noonan, S., De'ath, G., ...  
716 Lough, J. M. (2011). Losers and winners in coral reefs acclimatized to elevated  
717 carbon dioxide concentrations. *Nature Climate Change*, 1(3), 165–169.
- 718 Fan, T.-Y., Hsieh, Y.-C., Lin, K.-H., Kuo, F.-W., Soong, K., McRae, C. J., Edmunds, P.J.,  
719 Fang, L.-S. (2017). Plasticity in lunar timing of larval release of two brooding

## Positive carryover effects in corals

- 720 pocilloporid corals in an internal tide-induced upwelling reef. *Marine Ecology*  
721 *Progress Series*, 569, 117–127.
- 722 Fitt, W. K., McFarland, F. K., Warner, M. E., & Chilcoat, G. C. (2000). Seasonal patterns  
723 of tissue biomass and densities of symbiotic dinoflagellates in reef corals and  
724 relation to coral bleaching. *Limnology and Oceanography*, 45(3), 677–685.
- 725 Foo, S. A., & Byrne, M. (2016). Chapter Two - Acclimatization and Adaptive Capacity  
726 of Marine Species in a Changing Ocean. In B. E. Curry (Ed.), *Advances in Marine*  
727 *Biology* (Vol. 74, pp. 69–116). Academic Press.
- 728 Foster, T., Gilmour, J. P., Chua, C. M., Falter, J. L., & McCulloch, M. T. (2015). Effect  
729 of ocean warming and acidification on the early life stages of subtropical  
730 *Acropora spicifera*. *Coral Reefs*, 34(4), 1217–1226.
- 731 Gattuso, J. P., Epitalon, J. M., Lavigne, H., Orr, J., Gentili, B., Hagens, M., Hofmann, A.,  
732 Proye, A., Soetaert, K., Rae, J. (2016). Seacarb: seawater carbonate chemistry  
733 with R. *R Package Version*, 3.1.1(8).
- 734 Gaylord, B., Kroeker, K. J., Sunday, J. M., Anderson, K. M., Barry, J. P., Brown, N. E.,  
735 Connell, S.D., Dupont, S., Fabricius, K.E., Hall-Spencer, J.M., Klinger, T.,  
736 Milazzo, M., Munday, P.L., Russell, B.D., Sanford, E., Schreiber, S.J.,  
737 Thiagarajan, V., Vaughan M.L.H., Widdecombe, S., Harley, C. D. G. (2015).  
738 Ocean acidification through the lens of ecological theory. *Ecology*, 96(1), 3–15.  
739 <https://doi.org/10.1890/14-0802.1>
- 740 Gibbin, E. M., Chakravarti, L. J., Jarrold, M. D., Christen, F., Turpin, V., N'Siala, G. M.,  
741 Blier, P.U., Calosi, P. (2017). Can multi-generational exposure to ocean warming

## Positive carryover effects in corals

742 and acidification lead to the adaptation of life history and physiology in a marine  
743 metazoan? *Journal of Experimental Biology*, 220(4), 551–563.

744 Gibbin, E. M., Putnam, H. M., Davy, S. K., & Gates, R. D. (2014). Intracellular pH and  
745 its response to CO<sub>2</sub>-driven seawater acidification in symbiotic versus non-  
746 symbiotic coral cells. *Journal of Experimental Biology*, 217(11), 1963–1969.

747 Gibbin, E. M., Putnam, H. M., Gates, R. D., Nitschke, M. R., & Davy, S. K. (2015).  
748 Species-specific differences in thermal tolerance may define susceptibility to  
749 intracellular acidosis in reef corals. *Marine Biology*, 162(3), 717–723.

750 Grottoli, A. G., Warner, M. E., Levas, S. J., Aschaffenburg, M. D., Schoepf, V.,  
751 McGinley, M., Baumann, J., Matsui, Y. (2014). The cumulative impact of annual  
752 coral bleaching can turn some coral species winners into losers. *Global Change*  
753 *Biology*, 20(12), 3823–3833.

754 Guadayol, Ò., Silbiger, N. J., Donahue, M. J., & Thomas, F. I. (2014). Patterns in  
755 temporal variability of temperature, oxygen and pH along an environmental  
756 gradient in a coral reef. *PloS One*, 9(1), e85213.

757 Hartmann, A. C., Marhaver, K. L., Chamberland, V. F., Sandin, S. A., & Vermeij, M. J.  
758 (2013). Large birth size does not reduce negative latent effects of harsh  
759 environments across life stages in two coral species. *Ecology*, 94(9), 1966–1976.

760 Harvey, B. P., Gwynn-Jones, D., & Moore, P. J. (2013). Meta-analysis reveals complex  
761 marine biological responses to the interactive effects of ocean acidification and  
762 warming. *Ecology and Evolution*, 3(4), 1016–1030.

763 <https://doi.org/10.1002/ece3.516>

## Positive carryover effects in corals

- 764 Hettinger, A., Sanford, E., Hill, T. M., Lenz, E. A., Russell, A. D., & Gaylord, B. (2013).  
765 Larval carry-over effects from ocean acidification persist in the natural  
766 environment. *Global Change Biology*, 19(11), 3317–3326.
- 767 Hettinger, A., Sanford, E., Hill, T. M., Russell, A. D., Sato, K. N., Hoey, J., Forsch, M.,  
768 Page, H.N., Gaylord, B. (2012). Persistent carry-over effects of planktonic  
769 exposure to ocean acidification in the Olympia oyster. *Ecology*, 93(12), 2758–  
770 2768.
- 771 Huey, R. B., Berrigan, D., Gilchrist, G. W., & Herron, J. C. (1999). Testing the Adaptive  
772 Significance of Acclimation: A Strong Inference Approach. *Integrative and*  
773 *Comparative Biology*, 39(2), 323–336. <https://doi.org/10.1093/icb/39.2.323>
- 774 Johnston, E. C., Forsman, Z. H., & Toonen, R. J. (2018). A simple molecular technique  
775 for distinguishing species reveals frequent misidentification of Hawaiian corals in  
776 the genus *Pocillopora*. *PeerJ*, 6, e4355. <https://doi.org/10.7717/peerj.4355>
- 777 Jokieli, P. L. (1985). Lunar periodicity of planula release in the reef coral *Pocillopora*  
778 *damicornis* in relation to various environmental factors. In *Proc 5th Int Coral*  
779 *Reef Symp* (Vol. 4, pp. 307–312).
- 780 Jokieli, P. L., Rodgers, K. S., Kuffner, I. B., Andersson, A. J., Cox, E. F., & Mackenzie, F.  
781 T. (2008). Ocean acidification and calcifying reef organisms: a mesocosm  
782 investigation. *Coral Reefs*, 27(3), 473–483. [https://doi.org/10.1007/s00338-008-](https://doi.org/10.1007/s00338-008-0380-9)  
783 [0380-9](https://doi.org/10.1007/s00338-008-0380-9)
- 784 Jury, C. P., Thomas, F. I., Atkinson, M. J., & Toonen, R. J. (2013). Buffer capacity,  
785 ecosystem feedbacks, and seawater chemistry under global change. *Water*, 5(3),  
786 1303–1325.

## Positive carryover effects in corals

- 787 Kaniewska, P., Campbell, P. R., Kline, D. I., Rodriguez-Lanetty, M., Miller, D. J., Dove,  
788 S., & Hoegh-Guldberg, O. (2012). Major Cellular and Physiological Impacts of  
789 Ocean Acidification on a Reef Building Coral. *PLOS ONE*, 7(4), e34659.  
790 <https://doi.org/10.1371/journal.pone.0034659>
- 791 Kroeker, K. J., Kordas, R. L., Crim, R. N., & Singh, G. G. (2010). Meta-analysis reveals  
792 negative yet variable effects of ocean acidification on marine organisms. *Ecology*  
793 *Letters*, 13(11), 1419–1434.
- 794 Lane, A., Campanati, C., Dupont, S., & Thiagarajan, V. (2015). Trans-generational  
795 responses to low pH depend on parental gender in a calcifying tubeworm.  
796 *Scientific Reports*, 5.
- 797 Lee, H.-J., Chao, S.-Y., Fan, K.-L., Wang, Y.-H., & Liang, N.-K. (1997). Tidally induced  
798 upwelling in a semi-enclosed basin: Nan Wan Bay. *Journal of Oceanography*, 53,  
799 467–480.
- 800 Lesser, M. P. (2011). Coral Bleaching: Causes and Mechanisms. In Z. Dubinsky & N.  
801 Stambler (Eds.), *Coral Reefs: An Ecosystem in Transition* (pp. 405–419). Springer  
802 Netherlands. [https://doi.org/10.1007/978-94-007-0114-4\\_23](https://doi.org/10.1007/978-94-007-0114-4_23)
- 803 Little, A. F., Van Oppen, M. J., & Willis, B. L. (2004). Flexibility in algal endosymbioses  
804 shapes growth in reef corals. *Science*, 304(5676), 1492–1494.
- 805 Logan, C. A., Dunne, J. P., Eakin, C. M., & Donner, S. D. (2014). Incorporating adaptive  
806 responses into future projections of coral bleaching. *Global Change Biology*,  
807 20(1), 125–139.
- 808 Lushchak, V. I. (2014). Dissection of the hormetic curve: analysis of components and  
809 mechanisms. *Dose-Response*, 12(3), dose–response.



## Positive carryover effects in corals

- 810 Miller, G. M., Watson, S.-A., Donelson, J. M., McCormick, M. I., & Munday, P. L.  
811 (2012). Parental environment mediates impacts of increased carbon dioxide on a  
812 coral reef fish. *Nature Climate Change*, 2(12), 858–861.
- 813 Munday, P. L., Warner, R. R., Monro, K., Pandolfi, J. M., & Marshall, D. J. (2013).  
814 Predicting evolutionary responses to climate change in the sea. *Ecology Letters*,  
815 16(12), 1488–1500.
- 816 Negri, A. P., Marshall, P. A., & Heyward, A. J. (2007). Differing effects of thermal stress  
817 on coral fertilization and early embryogenesis in four Indo Pacific species. *Coral*  
818 *Reefs*, 26(4), 759–763.
- 819 Pachauri, R. K., Allen, M. R., Barros, V. R., Broome, J., Cramer, W., Christ, R., ...  
820 others. (2014). *Climate change 2014: synthesis Report. Contribution of working*  
821 *groups I, II and III to the fifth assessment report of the intergovernmental panel*  
822 *on climate change*. IPCC.
- 823 Padilla-Gamiño, J. L., Pochon, X., Bird, C., Concepcion, G. T., & Gates, R. D. (2012).  
824 From parent to gamete: vertical transmission of *Symbiodinium* (Dinophyceae)  
825 ITS2 sequence assemblages in the reef building coral *Montipora capitata*. *PLoS*  
826 *One*, 7(6), e38440.
- 827 Pandolfi, J. M., Connolly, S. R., Marshall, D. J., & Cohen, A. L. (2011). Projecting coral  
828 reef futures under global warming and ocean acidification. *Science*, 333(6041),  
829 418–422.
- 830 Parker, L. M., O'Connor, W. A., Byrne, M., Coleman, R. A., Virtue, P., Dove, M., Gibbs,  
831 M., Spohr, L., Scanes, E., Ross, P. M. (2017). Adult exposure to ocean  
832 acidification is maladaptive for larvae of the Sydney rock oyster *Saccostrea*

## Positive carryover effects in corals

- 833 *glomerata* in the presence of multiple stressors. *Biology Letters*, 13(2), 20160798.
- 834 <https://doi.org/10.1098/rsbl.2016.0798>
- 835 Parker, L. M., O'Connor, W. A., Raftos, D. A., Pörtner, H.-O., & Ross, P. M. (2015).
- 836 Persistence of Positive Carryover Effects in the Oyster, *Saccostrea glomerata*,
- 837 following Transgenerational Exposure to Ocean Acidification. *PLOS ONE*, 10(7),
- 838 e0132276. <https://doi.org/10.1371/journal.pone.0132276>
- 839 Parker, L. M., Ross, P. M., O'Connor, W. A., Borysko, L., Raftos, D. A., & Pörtner, H.-
- 840 O. (2012). Adult exposure influences offspring response to ocean acidification in
- 841 oysters. *Global Change Biology*, 18(1), 82–92.
- 842 Permata, W. D., Kinzie, R. A., & Hidaka, M. (2000). Histological studies on the origin of
- 843 planulae of the coral *Pocillopora damicornis*. *Marine Ecology Progress Series*,
- 844 191–200.
- 845 Price, N. N., Martz, T. R., Brainard, R. E., & Smith, J. E. (2012). Diel variability in
- 846 seawater pH relates to calcification and benthic community structure on coral
- 847 reefs. *PloS One*, 7(8), e43843.
- 848 Ptashne, M. (2013). Epigenetics: core misconception. *Proceedings of the National Academy*
- 849 *of Sciences*, 110(18), 7101–7103.
- 850 Putnam, H. M. (2012). *Resilience and acclimatization potential of reef corals under*
- 851 *predicted climate change stressors*. UNIVERSITY OF HAWAII 'I MĀNOA.
- 852 Putnam, H. M., Barott, K. L., Ainsworth, T. D., & Gates, R. D. (2017). The vulnerability
- 853 and resilience of reef-building corals. *Current Biology*, 27(11), R528–R540.

## Positive carryover effects in corals

- 854 Putnam, H. M., Davidson, J. M., & Gates, R. D. (2016). Ocean acidification influences  
855 host DNA methylation and phenotypic plasticity in environmentally susceptible  
856 corals. *Evolutionary Applications*, 9(9), 1165–1178.
- 857 Putnam, H. M., Edmunds, P. J., & Fan, T.-Y. (2010). Effect of a fluctuating thermal  
858 regime on adult and larval reef corals. *Invertebrate Biology*, 129(3), 199–209.
- 859 Putnam, H. M., & Gates, R. D. (2015). Preconditioning in the reef-building coral  
860 *Pocillopora damicornis* and the potential for trans-generational acclimatization in  
861 coral larvae under future climate change conditions. *Journal of Experimental*  
862 *Biology*, 218(15), 2365–2372.
- 863 R Core Team. (2016). *R: A language and environment for statistical computing*. Vienna,  
864 Austria: R Foundation for Statistical Computing.
- 865 Randall, C. J., & Szmant, A. M. (2009). Elevated temperature affects development,  
866 survivorship, and settlement of the elkhorn coral, *Acropora palmata* (Lamarck  
867 1816). *The Biological Bulletin*, 217(3), 269–282.
- 868 Richmond, R. H., & Jokiel, P. L. (1984). Lunar periodicity in larva release in the reef  
869 coral *Pocillopora damicornis* at Enewetak and Hawaii. *Bulletin of Marine Science*,  
870 34(2), 280–287.
- 871 Riebesell, U., Fabry, V. J., Hansson, L., Gattuso, J.-P., & others. (2010). *Guide to best*  
872 *practices for ocean acidification research and data reporting* (Vol. 260).  
873 Publications Office of the European Union Luxembourg.
- 874 Ritson-Williams, R., Arnold, S. N., & Paul, V. J. (2016). Patterns of larval settlement  
875 preferences and post-settlement survival for seven Caribbean corals. *Marine*  
876 *Ecology Progress Series*, 548, 127–138.

## Positive carryover effects in corals

- 877 Rivest, E. B., Comeau, S., & Cornwall, C. E. (2017). The Role of Natural Variability in  
878 Shaping the Response of Coral Reef Organisms to Climate Change. *Current*  
879 *Climate Change Reports*, 3(4), 271–281.
- 880 Rivest, E. B., & Hofmann, G. E. (2014). Responses of the metabolism of the larvae of  
881 *Pocillopora damicornis* to ocean acidification and warming. *PLoS One*, 9(4),  
882 e96172.
- 883 Rivest, E. B., & Hofmann, G. E. (2015). Effects of temperature and pCO<sub>2</sub> on lipid use  
884 and biological parameters of planulae of *Pocillopora damicornis*. *Journal of*  
885 *Experimental Marine Biology and Ecology*, 473, 43–52.
- 886 Rondon, R., Grunau, C., Fallet, M., Charlemagne, N., Sussarellu, R., Chaparro, C.,  
887 Montagnani, C., Mitta, G., Bachere, E., Akcha, F., Cosseau, C. (2017). Effects of  
888 a parental exposure to diuron on Pacific oyster spat methylome. *Environmental*  
889 *Epigenetics*, 3(1). <https://doi.org/10.1093/eep/dvx004>
- 890 Ross, C., Ritson-Williams, R., Olsen, K., & Paul, V. J. (2013). Short-term and latent  
891 post-settlement effects associated with elevated temperature and oxidative stress  
892 on larvae from the coral *Porites astreoides*. *Coral Reefs*, 32(1), 71–79.
- 893 Ross, P., Parker, L., & Byrne, M. (2016). Transgenerational responses of molluscs and  
894 echinoderms to changing ocean conditions. *ICES Journal of Marine Science:*  
895 *Journal Du Conseil*, fsv254.
- 896 Sharp, K. H., Distel, D., & Paul, V. J. (2012). Diversity and dynamics of bacterial  
897 communities in early life stages of the Caribbean coral *Porites astreoides*. *The*  
898 *ISME Journal*, 6(4), 790–801. <https://doi.org/10.1038/ismej.2011.144>

Positive carryover effects in corals

- 899 Silbiger, N. J., Guadayol, Ò., Thomas, F. I., & Donahue, M. J. (2014). Reefs shift from  
900 net accretion to net erosion along a natural environmental gradient. *Marine*  
901 *Ecology Progress Series*, 515, 33–44.
- 902 Southam, C. M., & Ehrlich, J. (1943). Effects of extract of western red-cedar heartwood  
903 on certain wood-decaying fungi in culture. *Phytopathology*, 33, 517–524.
- 904 Stimson, J. S. (1978). Mode and timing of reproduction in some common hermatypic  
905 corals of Hawaii and Enewetak. *Marine Biology*, 48(2), 173–184.
- 906 Stoddart, J. A. (1983). Asexual production of planulae in the coral *Pocillopora*  
907 *damicornis*. *Marine Biology*, 76(3), 279–284.
- 908 Stoddart, J. A., & Black, R. (1985). Cycles of gametogenesis and planulation in the coral  
909 *Pocillopora damicornis*. *Marine Ecology Progress Series*, 153–164.
- 910 Stumpp, M., Hu, M. Y., Melzner, F., Gutowska, M. A., Dorey, N., Himmerkus, N.,  
911 Holtmann, W.C., Dupont, S.T., Thorndyke, M.C., Bleich, M. (2012). Acidified  
912 seawater impacts sea urchin larvae pH regulatory systems relevant for  
913 calcification. *Proceedings of the National Academy of Sciences*, 109(44), 18192–  
914 18197. <https://doi.org/10.1073/pnas.1209174109>
- 915 Stumpp, M., Wren, J., Melzner, F., Thorndyke, M. C., & Dupont, S. T. (2011). CO<sub>2</sub>  
916 induced seawater acidification impacts sea urchin larval development I: elevated  
917 metabolic rates decrease scope for growth and induce developmental delay.  
918 *Comparative Biochemistry and Physiology Part A: Molecular & Integrative*  
919 *Physiology*, 160(3), 331–340.

## Positive carryover effects in corals

- 920 Sunday, J. M., Calosi, P., Dupont, S., Munday, P. L., Stillman, J. H., & Reusch, T. B.  
921 (2014). Evolution in an acidifying ocean. *Trends in Ecology & Evolution*, 29(2),  
922 117–125.
- 923 Sunday, J. M., Crim, R. N., Harley, C. D. G., & Hart, M. W. (2011). Quantifying Rates of  
924 Evolutionary Adaptation in Response to Ocean Acidification. *PLOS ONE*, 6(8),  
925 e22881. <https://doi.org/10.1371/journal.pone.0022881>
- 926 Thor, P., & Dupont, S. (2015). Transgenerational effects alleviate severe fecundity loss  
927 during ocean acidification in a ubiquitous planktonic copepod. *Global Change*  
928 *Biology*, 21(6), 2261–2271.
- 929 Thornhill, D. J., Rotjan, R. D., Todd, B. D., Chilcoat, G. C., Iglesias-Prieto, R., Kemp, D.  
930 W., LaJeunesse, T.C., McCabe Reynolds, J., Schmidt, G.W., Shannon, T., Warner,  
931 M.E., Fitt, W. K. (2011). A connection between colony biomass and death in  
932 Caribbean reef-building corals. *PLoS ONE*, 6(12), e29535.  
933 <https://doi.org/10.1371/journal.pone.0029535>
- 934 Torda, G., Donelson, J. M., Aranda, M., Barshis, D. J., Bay, L., Berumen, M. L., ...  
935 others. (2017). Rapid adaptive responses to climate change in corals. *Nature*  
936 *Climate Change*, 7(9), 627–636.
- 937 Van Hooidonk, R., Maynard, J. A., & Planes, S. (2013). Temporary refugia for coral  
938 reefs in a warming world. *Nature Climate Change*, 3(5), 508–511.
- 939 van Oppen, M. J. H., Gates, R. D., Blackall, L. L., Cantin, N., Chakravarti, L. J., Chan, W.  
940 Y., Cormick, C., Crean, A., Damjanovic, K., Epstein, H., Peplow, L.M., Jones,  
941 T.A., Miller, M., Pears, R.J., Torda, G., Wachenfeld, D., Weeks, A.R., Putnam,

Positive carryover effects in corals

- 942 H.M. (2017). Shifting paradigms in restoration of the world's coral reefs. *Global*  
943 *Change Biology*. <https://doi.org/10.1111/gcb.13647>
- 944 van Oppen, M. J., Oliver, J. K., Putnam, H. M., & Gates, R. D. (2015). Building coral  
945 reef resilience through assisted evolution. *Proceedings of the National Academy*  
946 *of Sciences*, 112(8), 2307–2313.
- 947 Veron, J. E. N., Hoegh-Guldberg, O., Lenton, T. M., Lough, J. M., Obura, D. O., Pearce-  
948 Kelly, P., Sheppard, C.R.C., Spalding, M., Stafford-Smith, M.G., Rogers, A. D.  
949 (2009). The coral reef crisis: The critical importance of < 350ppm CO<sub>2</sub>. *Marine*  
950 *Pollution Bulletin*, 58(10), 1428–1436.
- 951 Webster, N. S., & Reusch, T. B. (2017). Microbial contributions to the persistence of  
952 coral reefs. *The ISME Journal*.
- 953 Zhao, L., Schöne, B. R., Mertz-Kraus, R., & Yang, F. (2017). Sodium provides unique  
954 insights into transgenerational effects of ocean acidification on bivalve shell  
955 formation. *Science of The Total Environment*, 577, 360–366.
- 956 Zhao, L., Yang, F., Milano, S., Han, T., Walliser, E. O., & Schöne, B. R. (2018).  
957 Transgenerational acclimation to seawater acidification in the Manila clam  
958 *Ruditapes philippinarum*: Preferential uptake of metabolic carbon. *Science of The*  
959 *Total Environment*, 627, 95–103.
- 960 Zizzari, Z. V., & Ellers, J. (2014). Rapid shift in thermal resistance between generations  
961 through maternal heat exposure. *Oikos*, 123(11), 1365–1370.  
962 <https://doi.org/10.1111/oik.01496>  
963
